# Supplementary material for: Patches and Blebs: A Comparative Study of the Composition and Biophysical Properties of Two Plasma Membrane Preparations from CHO Cells
Source: PubMed Central journal article supplement (PMC7177368; doi:10.3390/ijms21072643), 2020-04-10
Supplement: ijms-21-02643-s001.pdf [file ijms-21-02643-s001.pdf]

## SUPPLEMENTARY MATERIAL

### **Patches and blebs: a comparative study of the composition and biophysical properties of two plasma membrane preparations from CHO cells**

Bingen G. Monasterio <sup>1,2</sup>, , Noemi Jiménez-Rojo <sup>3</sup>, Aritz B. García-Arribas <sup>1,2</sup> Félix M. Goñi <sup>1,2</sup>, Alicia Alonso <sup>1,2\*</sup>

<sup>1</sup>Instituto Biofísica (CSIC, UPV/EHU) and <sup>2</sup>Departamento de Bioquímica, Universidad del País Vasco, Leioa, Spain; <sup>3</sup>NCCR Chemical Biology, Department of Biochemistry, University of Geneva, 1211 Geneva, Switzerland.

\*Corresponding author. E-mail: [alicia.alonso@ehu.eus](mailto:alicia.alonso@ehu.eus)

**Table S1.** A summary of the lipidomic data from whole CHO cells and derived plasma membrane preparations, blebs (or GPMV) and patches.

|                  | GPMV control | SD GPMV control | GPMV  | SD GPMV | PM patches control | PM patches control SD | PM patches | PM patches SD |
|------------------|--------------|-----------------|-------|---------|--------------------|-----------------------|------------|---------------|
| Total_CER_H2O    | 0.27         | 0.06            | 0.76  | 0.11    | 0.41               | 0.00                  | 0.45       | 0.03          |
| Total_GlcCER_H2O | 0.21         | 0.02            | 1.00  | 0.16    | 0.42               | 0.06                  | 0.90       | 0.26          |
| Total_SM         | 3.57         | 0.72            | 2.71  | 0.53    | 3.71               | 1.04                  | 3.47       | 0.48          |
| Total_PC         | 74.91        | 0.48            | 68.79 | 4.18    | 68.54              | 0.93                  | 74.55      | 2.14          |
| Total_PE         | 9.08         | 0.24            | 8.69  | 2.43    | 9.20               | 1.20                  | 10.11      | 0.73          |
| Total_PI         | 6.37         | 0.62            | 12.07 | 2.49    | 7.91               | 0.01                  | 5.05       | 0.49          |
| Total_PS         | 4.76         | 0.46            | 8.32  | 0.48    | 6.57               | 0.21                  | 5.16       | 0.34          |
| Total_CL         | 0.48         | 0.10            | 0.04  | 0.04    | 0.50               | 0.04                  | 0.23       | 0.03          |
| Total_Chol       | 3.28         | 0.19            | 23.39 | 1.76    | 3.12               | 0.17                  | 5.91       | 0.29          |
| GPL_short        | 10.30        | 0.21            | 25.79 | 1.91    | 8.10               | 0.12                  | 12.00      | 0.58          |
| GPL_long         | 84.63        | 0.77            | 68.98 | 1.55    | 82.66              | 0.96                  | 82.46      | 1.31          |
| GPL_very_long    | 0.46         | 0.02            | 0.44  | 0.11    | 0.50               | 0.02                  | 0.41       | 0.03          |
| PC_Lyso          | 0.08         | 0.00            | 0.27  | 0.02    | 0.14               | 0.01                  | 0.05       | 0.01          |
| PE_Lyso          | 0.07         | 0.00            | 0.13  | 0.04    | 0.07               | 0.01                  | 0.03       | 0.00          |
| PI_Lyso          | 0.04         | 0.00            | 0.21  | 0.08    | 0.09               | 0.01                  | 0.05       | 0.01          |
| PS_Lyso          | 0.01         | 0.00            | 0.46  | 0.23    | 0.01               | 0.00                  | 0.02       | 0.01          |
| PC_Ether         | 11.00        | 0.24            | 17.65 | 1.46    | 10.78              | 0.23                  | 12.43      | 0.31          |
| PE_Ether         | 0.23         | 0.01            | 4.75  | 2.17    | 0.23               | 0.00                  | 0.47       | 0.15          |
| PI_Ether         | 0.25         | 0.04            | 5.11  | 1.10    | 0.36               | 0.01                  | 0.56       | 0.20          |
| PS_Ether         | 0.15         | 0.01            | 1.06  | 0.38    | 0.28               | 0.01                  | 0.21       | 0.02          |
| CER_H2O          | 0.25         | 0.06            | 0.69  | 0.10    | 0.38               | 0.02                  | 0.43       | 0.03          |
| DHCER_H2O        | 0.02         | 0.01            | 0.05  | 0.01    | 0.02               | 0.00                  | 0.01       | 0.00          |
| CERP_H2O         | 0.00         | 0.00            | 0.02  | 0.00    | 0.01               | 0.00                  | 0.00       | 0.00          |
| GlcCER_H2O       | 0.21         | 0.02            | 0.98  | 0.16    | 0.42               | 0.06                  | 0.89       | 0.27          |
| GlcDHCER_H2O     | 0.00         | 0.00            | 0.02  | 0.00    | 0.00               | 0.00                  | 0.01       | 0.00          |
| SM               | 3.49         | 0.70            | 2.60  | 0.52    | 3.54               | 1.06                  | 3.39       | 0.47          |
| DHSM             | 0.08         | 0.01            | 0.11  | 0.01    | 0.34               | 0.02                  | 0.08       | 0.01          |
| DB_0             | 4.87         | 0.12            | 6.28  | 0.18    | 3.75               | 0.07                  | 4.55       | 0.06          |
| DB_1             | 41.31        | 0.94            | 33.65 | 3.76    | 37.39              | 0.33                  | 40.96      | 0.58          |
| DB_2             | 23.42        | 0.05            | 14.12 | 1.71    | 23.62              | 0.44                  | 24.99      | 0.88          |
| DB_3             | 3.41         | 0.15            | 2.29  | 0.36    | 3.31               | 0.06                  | 2.92       | 0.12          |
| DB_4             | 4.70         | 0.21            | 1.79  | 0.15    | 4.96               | 0.03                  | 3.30       | 0.07          |
| DB_5             | 3.39         | 0.19            | 2.14  | 0.19    | 3.77               | 0.07                  | 2.42       | 0.09          |
| DB_6             | 2.46         | 0.17            | 5.29  | 1.34    | 2.48               | 0.04                  | 1.92       | 0.12          |
| CL_2_DB          | 0.06         | 0.06            | 0.00  | 0.00    | 0.00               | 0.00                  | 0.00       | 0.00          |
| CL_3_DB          | 0.04         | 0.00            | 0.00  | 0.00    | 0.04               | 0.00                  | 0.02       | 0.00          |
| CL_4_DB          | 0.11         | 0.02            | 0.00  | 0.00    | 0.13               | 0.02                  | 0.07       | 0.01          |

|              |       |      |       |      |       |      |       |      |
|--------------|-------|------|-------|------|-------|------|-------|------|
| CL_5_DB      | 0.13  | 0.01 | 0.00  | 0.01 | 0.20  | 0.01 | 0.09  | 0.01 |
| CL_6_DB      | 0.10  | 0.01 | 0.02  | 0.01 | 0.10  | 0.01 | 0.04  | 0.00 |
| CL_7_DB      | 0.02  | 0.00 | 0.00  | 0.00 | 0.02  | 0.00 | 0.01  | 0.00 |
| PC_UI_0      | 5.38  | 0.13 | 7.47  | 0.12 | 4.09  | 0.05 | 5.15  | 0.10 |
| PC_UI_1      | 40.08 | 0.84 | 42.47 | 2.02 | 35.24 | 0.58 | 40.56 | 0.62 |
| PC_UI_2      | 21.89 | 0.19 | 14.00 | 1.73 | 21.89 | 0.47 | 23.33 | 1.27 |
| PC_UI_3      | 2.68  | 0.12 | 1.74  | 0.24 | 2.55  | 0.07 | 2.31  | 0.18 |
| PC_UI_4      | 2.01  | 0.13 | 1.18  | 0.15 | 1.85  | 0.02 | 1.28  | 0.11 |
| PC_UI_5      | 1.65  | 0.13 | 0.95  | 0.13 | 1.74  | 0.02 | 1.07  | 0.09 |
| PC_UI_6      | 1.22  | 0.12 | 0.97  | 0.08 | 1.21  | 0.02 | 0.84  | 0.06 |
| PE_UI_0      | 0.21  | 0.01 | 0.43  | 0.07 | 0.21  | 0.01 | 0.26  | 0.03 |
| PE_UI_1      | 2.23  | 0.05 | 1.69  | 0.20 | 1.89  | 0.02 | 2.96  | 0.24 |
| PE_UI_2      | 2.20  | 0.05 | 1.13  | 0.21 | 1.92  | 0.05 | 2.81  | 0.19 |
| PE_UI_3      | 0.50  | 0.03 | 0.53  | 0.16 | 0.40  | 0.01 | 0.56  | 0.05 |
| PE_UI_4      | 1.23  | 0.04 | 3.12  | 1.16 | 1.10  | 0.01 | 1.32  | 0.17 |
| PE_UI_5      | 1.42  | 0.07 | 0.39  | 0.08 | 1.39  | 0.04 | 1.21  | 0.06 |
| PE_UI_6      | 1.29  | 0.07 | 0.39  | 0.06 | 1.19  | 0.03 | 1.00  | 0.01 |
| PI_UI_0      | 0.16  | 0.02 | 0.28  | 0.03 | 0.24  | 0.00 | 0.12  | 0.00 |
| PI_UI_1      | 1.79  | 0.32 | 1.13  | 0.34 | 2.16  | 0.07 | 1.20  | 0.05 |
| PI_UI_2      | 1.43  | 0.15 | 3.65  | 0.21 | 1.75  | 0.04 | 1.46  | 0.21 |
| PI_UI_3      | 0.63  | 0.04 | 0.66  | 0.08 | 0.74  | 0.01 | 0.50  | 0.04 |
| PI_UI_4      | 1.81  | 0.09 | 0.43  | 0.08 | 2.28  | 0.07 | 1.21  | 0.04 |
| PI_UI_5      | 0.41  | 0.02 | 1.10  | 0.30 | 0.57  | 0.02 | 0.30  | 0.06 |
| PI_UI_6      | 0.14  | 0.01 | 2.24  | 0.49 | 0.17  | 0.01 | 0.26  | 0.11 |
| PS_UI_0      | 0.30  | 0.02 | 3.05  | 0.06 | 0.31  | 0.01 | 0.21  | 0.00 |
| PS_UI_1      | 2.56  | 0.29 | 2.63  | 0.16 | 3.80  | 0.09 | 3.20  | 0.27 |
| PS_UI_2      | 0.40  | 0.04 | 0.27  | 0.03 | 0.57  | 0.02 | 0.52  | 0.02 |
| PS_UI_3      | 0.18  | 0.01 | 0.54  | 0.34 | 0.20  | 0.01 | 0.18  | 0.02 |
| PS_UI_4      | 0.39  | 0.04 | 1.7   | 0.06 | 0.42  | 0.02 | 0.25  | 0.01 |
| PS_UI_5      | 0.70  | 0.05 | 0.48  | 0.09 | 0.84  | 0.06 | 0.47  | 0.03 |
| PS_UI_6      | 0.43  | 0.03 | 0.56  | 0.10 | 0.48  | 0.02 | 0.33  | 0.01 |
| PC_short     | 10.03 | 0.22 | 22.12 | 1.34 | 7.78  | 0.13 | 11.56 | 0.48 |
| PC_long      | 64.71 | 0.52 | 46.53 | 5.30 | 60.37 | 0.96 | 62.85 | 2.60 |
| PC_very_long | 0.17  | 0.01 | 0.14  | 0.03 | 0.16  | 0.01 | 0.14  | 0.03 |
| PE_short     | 0.15  | 0.01 | 1.24  | 0.23 | 0.15  | 0.00 | 0.23  | 0.04 |
| PE_long      | 8.85  | 0.24 | 7.45  | 2.21 | 7.93  | 0.13 | 9.81  | 0.69 |
| PE_very_long | 0.08  | 0.00 | 0.00  | 0.00 | 0.07  | 0.00 | 0.07  | 0.00 |
| PI_short     | 0.10  | 0.01 | 0.77  | 0.05 | 0.09  | 0.00 | 0.11  | 0.02 |
| PI_long      | 6.16  | 0.59 | 11.02 | 2.31 | 7.73  | 0.01 | 4.84  | 0.46 |
| PI_very_long | 0.11  | 0.01 | 0.28  | 0.16 | 0.09  | 0.00 | 0.10  | 0.00 |
| PS_short     | 0.16  | 0.00 | 3.77  | 0.46 | 0.08  | 0.00 | 0.11  | 0.04 |
| PS_long      | 4.68  | 0.44 | 5.40  | 0.17 | 6.29  | 0.20 | 4.96  | 0.31 |
| PS_very_long | 0.11  | 0.02 | 0.05  | 0.02 | 0.19  | 0.01 | 0.09  | 0.01 |
| CER_H2O_10   | 0.00  | 0.00 | 0.01  | 0.00 | 0.00  | 0.00 | 0.00  | 0.00 |

|               |       |      |       |      |       |      |       |      |
|---------------|-------|------|-------|------|-------|------|-------|------|
| CER_H2O_14    | 0.00  | 0.00 | 0.01  | 0.01 | 0.00  | 0.00 | 0.00  | 0.00 |
| CER_H2O_16    | 0.13  | 0.03 | 0.21  | 0.02 | 0.19  | 0.01 | 0.27  | 0.01 |
| CER_H2O_18    | 0.01  | 0.00 | 0.09  | 0.03 | 0.01  | 0.00 | 0.01  | 0.00 |
| CER_H2O_20    | 0.00  | 0.00 | 0.04  | 0.01 | 0.00  | 0.00 | 0.00  | 0.00 |
| CER_H2O_22    | 0.01  | 0.00 | 0.05  | 0.01 | 0.06  | 0.01 | 0.02  | 0.00 |
| CER_H2O_24    | 0.11  | 0.03 | 0.25  | 0.03 | 0.16  | 0.01 | 0.14  | 0.02 |
| CER_H2O_26    | 0.00  | 0.00 | 0.10  | 0.03 | 0.00  | 0.00 | 0.01  | 0.00 |
| GlcCER_H2O_10 | 0.00  | 0.00 | 0.03  | 0.02 | 0.00  | 0.00 | 0.00  | 0.00 |
| GlcCER_H2O_12 | 0.00  | 0.00 | 0.02  | 0.01 | 0.01  | 0.00 | 0.00  | 0.00 |
| GlcCER_H2O_14 | 0.00  | 0.00 | 0.03  | 0.02 | 0.00  | 0.00 | 0.00  | 0.00 |
| GlcCER_H2O_16 | 0.13  | 0.01 | 0.61  | 0.10 | 0.27  | 0.04 | 0.60  | 0.16 |
| GlcCER_H2O_18 | 0.00  | 0.00 | 0.03  | 0.00 | 0.00  | 0.00 | 0.01  | 0.00 |
| GlcCER_H2O_20 | 0.00  | 0.00 | 0.01  | 0.01 | 0.00  | 0.00 | 0.00  | 0.00 |
| GlcCER_H2O_22 | 0.01  | 0.00 | 0.05  | 0.00 | 0.02  | 0.01 | 0.05  | 0.02 |
| GlcCER_H2O_24 | 0.07  | 0.01 | 0.20  | 0.05 | 0.12  | 0.01 | 0.23  | 0.08 |
| GlcCER_H2O_26 | 0.00  | 0.00 | 0.01  | 0.00 | 0.00  | 0.00 | 0.00  | 0.00 |
| SM_14         | 0.03  | 0.00 | 0.03  | 0.00 | 0.05  | 0.01 | 0.03  | 0.00 |
| SM_16         | 3.23  | 0.70 | 2.45  | 0.48 | 5.26  | 1.22 | 3.23  | 0.43 |
| SM_18         | 0.01  | 0.01 | 0.01  | 0.00 | 0.12  | 0.02 | 0.01  | 0.00 |
| SM_20         | 0.00  | 0.00 | 0.00  | 0.00 | 0.12  | 0.03 | 0.00  | 0.00 |
| SM_22         | 0.03  | 0.00 | 0.06  | 0.00 | 0.52  | 0.12 | 0.02  | 0.00 |
| SM_24         | 0.27  | 0.03 | 0.16  | 0.04 | 0.53  | 0.05 | 0.18  | 0.05 |
| PC_28         | 0.14  | 0.02 | 0.42  | 0.04 | 0.07  | 0.00 | 0.16  | 0.02 |
| PC_30         | 1.83  | 0.07 | 4.97  | 0.40 | 1.10  | 0.08 | 2.94  | 0.37 |
| PC_32         | 8.03  | 0.14 | 16.65 | 1.55 | 6.61  | 0.07 | 8.44  | 0.09 |
| PC_34         | 35.53 | 1.26 | 26.39 | 3.00 | 30.83 | 0.55 | 33.28 | 0.99 |
| PC_36         | 23.35 | 0.45 | 15.67 | 1.90 | 23.82 | 0.40 | 24.46 | 1.40 |
| PC_38         | 4.78  | 0.34 | 3.64  | 0.53 | 4.67  | 0.05 | 4.36  | 0.21 |
| PC_40         | 1.00  | 0.08 | 0.64  | 0.06 | 1.00  | 0.02 | 0.71  | 0.07 |
| PC_42         | 0.14  | 0.01 | 0.10  | 0.02 | 0.13  | 0.01 | 0.11  | 0.02 |
| PC_44         | 0.03  | 0.00 | 0.04  | 0.01 | 0.03  | 0.00 | 0.03  | 0.01 |
| PE_28         | 0.00  | 0.00 | 0.04  | 0.01 | 0.00  | 0.00 | 0.00  | 0.00 |
| PE_30         | 0.01  | 0.00 | 0.44  | 0.10 | 0.01  | 0.00 | 0.03  | 0.01 |
| PE_32         | 0.13  | 0.00 | 0.69  | 0.10 | 0.13  | 0.00 | 0.19  | 0.03 |
| PE_34         | 1.34  | 0.04 | 4.75  | 1.96 | 1.12  | 0.02 | 1.84  | 0.21 |
| PE_36         | 3.38  | 0.05 | 1.73  | 0.39 | 3.00  | 0.05 | 4.40  | 0.35 |
| PE_38         | 1.92  | 0.10 | 0.52  | 0.14 | 1.76  | 0.02 | 1.83  | 0.09 |
| PE_40         | 2.15  | 0.10 | 0.39  | 0.13 | 1.96  | 0.06 | 1.71  | 0.07 |
| PE_42         | 0.07  | 0.00 | 0.00  | 0.00 | 0.05  | 0.00 | 0.06  | 0.00 |
| PE_44         | 0.01  | 0.00 | 0.00  | 0.00 | 0.01  | 0.00 | 0.01  | 0.00 |
| PI_28         | 0.00  | 0.00 | 0.03  | 0.03 | 0.00  | 0.00 | 0.00  | 0.00 |
| PI_30         | 0.02  | 0.00 | 0.25  | 0.08 | 0.01  | 0.00 | 0.03  | 0.01 |
| PI_32         | 0.07  | 0.01 | 0.33  | 0.06 | 0.08  | 0.00 | 0.07  | 0.01 |
| PI_34         | 0.94  | 0.17 | 0.28  | 0.18 | 1.16  | 0.02 | 0.54  | 0.04 |

|                    |      |      |       |      |      |      |       |      |
|--------------------|------|------|-------|------|------|------|-------|------|
| PI_36              | 2.28 | 0.31 | 4.23  | 1.12 | 2.89 | 0.10 | 1.90  | 0.21 |
| PI_38              | 2.44 | 0.12 | 5.06  | 0.86 | 3.04 | 0.09 | 2.04  | 0.24 |
| PI_40              | 0.46 | 0.03 | 1.40  | 0.48 | 0.55 | 0.02 | 0.33  | 0.06 |
| PI_42              | 0.08 | 0.01 | 0.12  | 0.09 | 0.06 | 0.00 | 0.07  | 0.00 |
| PI_44              | 0.03 | 0.00 | 0.16  | 0.10 | 0.02 | 0.00 | 0.03  | 0.00 |
| PS_30              | 0.00 | 0.00 | 0.35  | 0.07 | 0.00 | 0.00 | 0.02  | 0.02 |
| PS_32              | 0.02 | 0.00 | 0.84  | 0.17 | 0.08 | 0.00 | 0.06  | 0.02 |
| PS_34              | 0.52 | 0.05 | 1.12  | 0.27 | 0.56 | 0.02 | 0.53  | 0.02 |
| PS_36              | 2.77 | 0.26 | 1.82  | 0.18 | 3.60 | 0.08 | 3.06  | 0.24 |
| PS_38              | 0.36 | 0.03 | 0.20  | 0.03 | 0.46 | 0.03 | 0.35  | 0.01 |
| PS_40              | 1.24 | 0.12 | 0.84  | 0.11 | 1.68 | 0.09 | 1.01  | 0.05 |
| PS_42              | 0.09 | 0.02 | 0.01  | 0.02 | 0.18 | 0.01 | 0.09  | 0.01 |
| PS_44              | 0.01 | 0.00 | 0.00  | 0.00 | 0.01 | 0.00 | 0.00  | 0.00 |
| CL_68              | 0.05 | 0.01 | 0.00  | 0.00 | 0.06 | 0.01 | 0.03  | 0.00 |
| CL_70              | 0.23 | 0.07 | 0.00  | 0.00 | 0.21 | 0.02 | 0.11  | 0.02 |
| CL_72              | 0.17 | 0.01 | 0.00  | 0.00 | 0.21 | 0.02 | 0.09  | 0.01 |
| CL_74              | 0.02 | 0.01 | 0.02  | 0.01 | 0.02 | 0.00 | 0.01  | 0.00 |
| CL_76              | 0.00 | 0.00 | 0.02  | 0.03 | 0.00 | 0.00 | 0.00  | 0.00 |
| PC_Lyso_short      | 0.03 | 0.00 | 0.09  | 0.01 | 0.07 | 0.01 | 0.02  | 0.00 |
| PC_Lyso_long       | 0.05 | 0.00 | 0.19  | 0.02 | 0.07 | 0.00 | 0.03  | 0.01 |
| PE_Lyso_short      | 0.01 | 0.00 | 0.07  | 0.04 | 0.01 | 0.00 | 0.00  | 0.00 |
| PE_Lyso_long       | 0.06 | 0.00 | 0.06  | 0.03 | 0.06 | 0.01 | 0.03  | 0.00 |
| PI_Lyso_short      | 0.00 | 0.00 | 0.16  | 0.08 | 0.01 | 0.00 | 0.01  | 0.00 |
| PI_Lyso_long       | 0.04 | 0.00 | 0.05  | 0.03 | 0.08 | 0.01 | 0.04  | 0.01 |
| PS_Lyso_short      | 0.00 | 0.00 | 0.46  | 0.23 | 0.00 | 0.00 | 0.02  | 0.01 |
| PC_Lyso_UI_0       | 0.05 | 0.00 | 0.20  | 0.01 | 0.09 | 0.00 | 0.03  | 0.00 |
| PC_Lyso_UI_1       | 0.04 | 0.00 | 0.04  | 0.01 | 0.05 | 0.00 | 0.02  | 0.00 |
| PC_Lyso_UI_2       | 0.00 | 0.00 | 0.04  | 0.01 | 0.00 | 0.00 | 0.00  | 0.00 |
| PE_Lyso_UI_0       | 0.03 | 0.00 | 0.01  | 0.01 | 0.03 | 0.00 | 0.01  | 0.00 |
| PE_Lyso_UI_1       | 0.04 | 0.00 | 0.09  | 0.05 | 0.04 | 0.01 | 0.02  | 0.00 |
| PE_Lyso_UI_2       | 0.00 | 0.00 | 0.02  | 0.01 | 0.00 | 0.00 | 0.00  | 0.00 |
| PI_Lyso_UI_0       | 0.03 | 0.00 | 0.05  | 0.03 | 0.07 | 0.01 | 0.03  | 0.01 |
| PI_Lyso_UI_1       | 0.01 | 0.00 | 0.16  | 0.08 | 0.02 | 0.00 | 0.01  | 0.00 |
| PS_Lyso_UI_1       | 0.00 | 0.00 | 0.46  | 0.23 | 0.00 | 0.00 | 0.02  | 0.01 |
| PC_Ether_short     | 1.10 | 0.03 | 10.38 | 2.01 | 0.90 | 0.04 | 1.80  | 0.27 |
| PC_Ether_long      | 9.83 | 0.22 | 7.22  | 0.74 | 9.80 | 0.24 | 10.57 | 0.54 |
| PC_Ether_very_long | 0.07 | 0.00 | 0.05  | 0.01 | 0.07 | 0.01 | 0.06  | 0.02 |
| PE_Ether_short     | 0.00 | 0.00 | 0.32  | 0.06 | 0.02 | 0.00 | 0.02  | 0.01 |
| PE_Ether_long      | 0.23 | 0.01 | 4.43  | 2.12 | 0.21 | 0.00 | 0.45  | 0.14 |
| PI_Ether_short     | 0.01 | 0.00 | 0.14  | 0.03 | 0.02 | 0.00 | 0.01  | 0.01 |
| PI_Ether_long      | 0.23 | 0.04 | 4.86  | 1.04 | 0.33 | 0.01 | 0.53  | 0.19 |
| PI_Ether_very_long | 0.01 | 0.00 | 0.11  | 0.09 | 0.01 | 0.00 | 0.01  | 0.00 |
| PS_Ether_short     | 0.00 | 0.00 | 0.11  | 0.03 | 0.06 | 0.00 | 0.01  | 0.01 |
| PS_Ether_long      | 0.14 | 0.01 | 0.95  | 0.36 | 0.20 | 0.02 | 0.19  | 0.02 |

|                           |      |      |       |      |      |      |      |      |
|---------------------------|------|------|-------|------|------|------|------|------|
| <b>PS_Ether_very_long</b> | 0.01 | 0.00 | 0.00  | 0.00 | 0.01 | 0.00 | 0.00 | 0.00 |
| <b>PC_Ether_UI_0</b>      | 0.95 | 0.04 | 1.65  | 0.02 | 0.79 | 0.01 | 1.09 | 0.03 |
| <b>PC_Ether_UI_1</b>      | 5.45 | 0.15 | 13.20 | 1.58 | 5.47 | 0.17 | 6.63 | 0.12 |
| <b>PC_Ether_UI_2</b>      | 2.39 | 0.09 | 1.50  | 0.19 | 2.47 | 0.10 | 2.68 | 0.19 |
| <b>PC_Ether_UI_3</b>      | 0.52 | 0.02 | 0.31  | 0.04 | 0.52 | 0.02 | 0.53 | 0.07 |
| <b>PC_Ether_UI_4</b>      | 0.61 | 0.02 | 0.31  | 0.05 | 0.58 | 0.01 | 0.53 | 0.07 |
| <b>PC_Ether_UI_5</b>      | 0.61 | 0.03 | 0.31  | 0.05 | 0.66 | 0.02 | 0.53 | 0.05 |
| <b>PC_Ether_UI_6</b>      | 0.48 | 0.03 | 0.37  | 0.04 | 0.47 | 0.01 | 0.44 | 0.04 |
| <b>PE_Ether_UI_0</b>      | 0.00 | 0.00 | 0.17  | 0.04 | 0.02 | 0.00 | 0.01 | 0.00 |
| <b>PE_Ether_UI_1</b>      | 0.04 | 0.00 | 0.19  | 0.02 | 0.03 | 0.00 | 0.06 | 0.01 |
| <b>PE_Ether_UI_2</b>      | 0.01 | 0.00 | 0.13  | 0.04 | 0.01 | 0.00 | 0.03 | 0.01 |
| <b>PE_Ether_UI_3</b>      | 0.01 | 0.00 | 0.28  | 0.10 | 0.01 | 0.00 | 0.04 | 0.01 |
| <b>PE_Ether_UI_4</b>      | 0.04 | 0.00 | 3.86  | 1.95 | 0.04 | 0.00 | 0.21 | 0.12 |
| <b>PE_Ether_UI_5</b>      | 0.04 | 0.00 | 0.11  | 0.05 | 0.04 | 0.00 | 0.06 | 0.01 |
| <b>PE_Ether_UI_6</b>      | 0.07 | 0.00 | 0.01  | 0.01 | 0.07 | 0.00 | 0.07 | 0.00 |
| <b>PI_Ether_UI_0</b>      | 0.00 | 0.00 | 0.05  | 0.01 | 0.03 | 0.00 | 0.00 | 0.00 |
| <b>PI_Ether_UI_1</b>      | 0.06 | 0.01 | 0.33  | 0.09 | 0.09 | 0.00 | 0.07 | 0.01 |
| <b>PI_Ether_UI_2</b>      | 0.10 | 0.01 | 4.33  | 1.02 | 0.11 | 0.00 | 0.40 | 0.17 |
| <b>PI_Ether_UI_3</b>      | 0.03 | 0.01 | 0.11  | 0.04 | 0.04 | 0.00 | 0.03 | 0.01 |
| <b>PI_Ether_UI_4</b>      | 0.03 | 0.00 | 0.03  | 0.01 | 0.05 | 0.00 | 0.02 | 0.00 |
| <b>PI_Ether_UI_5</b>      | 0.02 | 0.00 | 0.21  | 0.07 | 0.04 | 0.00 | 0.03 | 0.01 |
| <b>PI_Ether_UI_6</b>      | 0.01 | 0.00 | 0.04  | 0.01 | 0.00 | 0.00 | 0.01 | 0.00 |
| <b>PS_Ether_UI_0</b>      | 0.01 | 0.00 | 0.08  | 0.02 | 0.07 | 0.00 | 0.01 | 0.00 |
| <b>PS_Ether_UI_1</b>      | 0.09 | 0.01 | 0.17  | 0.02 | 0.13 | 0.01 | 0.12 | 0.01 |
| <b>PS_Ether_UI_2</b>      | 0.02 | 0.00 | 0.03  | 0.02 | 0.03 | 0.00 | 0.02 | 0.00 |
| <b>PS_Ether_UI_3</b>      | 0.00 | 0.00 | 0.76  | 0.35 | 0.00 | 0.00 | 0.04 | 0.01 |
| <b>PS_Ether_UI_5</b>      | 0.01 | 0.00 | 0.01  | 0.00 | 0.02 | 0.00 | 0.01 | 0.00 |
| <b>PS_Ether_UI_6</b>      | 0.01 | 0.00 | 0.02  | 0.01 | 0.01 | 0.00 | 0.01 | 0.00 |
| <b>PC_Ether_30</b>        | 0.15 | 0.01 | 0.35  | 0.01 | 0.09 | 0.00 | 0.18 | 0.01 |
| <b>PC_Ether_32</b>        | 0.95 | 0.04 | 10.04 | 2.00 | 0.81 | 0.04 | 1.62 | 0.26 |
| <b>PC_Ether_34</b>        | 4.66 | 0.19 | 3.76  | 0.41 | 4.72 | 0.22 | 5.27 | 0.12 |
| <b>PC_Ether_36</b>        | 3.35 | 0.10 | 2.36  | 0.20 | 3.49 | 0.12 | 3.53 | 0.28 |
| <b>PC_Ether_38</b>        | 1.46 | 0.08 | 0.91  | 0.16 | 1.49 | 0.04 | 1.46 | 0.11 |
| <b>PC_Ether_40</b>        | 0.36 | 0.02 | 0.20  | 0.01 | 0.37 | 0.01 | 0.31 | 0.05 |
| <b>PC_Ether_42</b>        | 0.06 | 0.00 | 0.04  | 0.01 | 0.06 | 0.00 | 0.05 | 0.02 |
| <b>PC_Ether_44</b>        | 0.01 | 0.00 | 0.01  | 0.00 | 0.01 | 0.00 | 0.01 | 0.00 |
| <b>PE_Ether_30</b>        | 0.00 | 0.00 | 0.21  | 0.03 | 0.00 | 0.00 | 0.01 | 0.00 |
| <b>PE_Ether_32</b>        | 0.00 | 0.00 | 0.11  | 0.03 | 0.02 | 0.00 | 0.01 | 0.00 |
| <b>PE_Ether_34</b>        | 0.07 | 0.00 | 4.13  | 2.01 | 0.05 | 0.00 | 0.25 | 0.13 |
| <b>PE_Ether_36</b>        | 0.03 | 0.00 | 0.16  | 0.06 | 0.03 | 0.00 | 0.06 | 0.01 |
| <b>PE_Ether_38</b>        | 0.09 | 0.00 | 0.13  | 0.06 | 0.09 | 0.00 | 0.10 | 0.01 |
| <b>PE_Ether_40</b>        | 0.04 | 0.00 | 0.00  | 0.01 | 0.04 | 0.00 | 0.03 | 0.00 |
| <b>PI_Ether_30</b>        | 0.00 | 0.00 | 0.11  | 0.03 | 0.00 | 0.00 | 0.01 | 0.01 |
| <b>PI_Ether_32</b>        | 0.00 | 0.00 | 0.03  | 0.00 | 0.02 | 0.00 | 0.00 | 0.00 |

|                    |      |      |      |      |      |      |      |      |
|--------------------|------|------|------|------|------|------|------|------|
| <b>PI_Ether_34</b> | 0.00 | 0.00 | 0.04 | 0.01 | 0.00 | 0.00 | 0.00 | 0.00 |
| <b>PI_Ether_36</b> | 0.08 | 0.02 | 0.13 | 0.02 | 0.14 | 0.00 | 0.07 | 0.00 |
| <b>PI_Ether_38</b> | 0.11 | 0.02 | 4.69 | 1.02 | 0.14 | 0.01 | 0.45 | 0.19 |
| <b>PI_Ether_40</b> | 0.03 | 0.00 | 0.00 | 0.00 | 0.04 | 0.00 | 0.01 | 0.00 |
| <b>PI_Ether_42</b> | 0.01 | 0.00 | 0.11 | 0.09 | 0.01 | 0.00 | 0.01 | 0.00 |
| <b>PS_Ether_30</b> | 0.00 | 0.00 | 0.09 | 0.02 | 0.00 | 0.00 | 0.01 | 0.00 |
| <b>PS_Ether_32</b> | 0.00 | 0.00 | 0.02 | 0.01 | 0.06 | 0.01 | 0.00 | 0.00 |
| <b>PS_Ether_34</b> | 0.01 | 0.00 | 0.86 | 0.37 | 0.02 | 0.00 | 0.06 | 0.01 |
| <b>PS_Ether_36</b> | 0.07 | 0.01 | 0.06 | 0.02 | 0.11 | 0.01 | 0.09 | 0.00 |
| <b>PS_Ether_38</b> | 0.03 | 0.00 | 0.03 | 0.01 | 0.05 | 0.01 | 0.04 | 0.00 |
| <b>PS_Ether_40</b> | 0.02 | 0.00 | 0.00 | 0.00 | 0.02 | 0.00 | 0.01 | 0.00 |

---

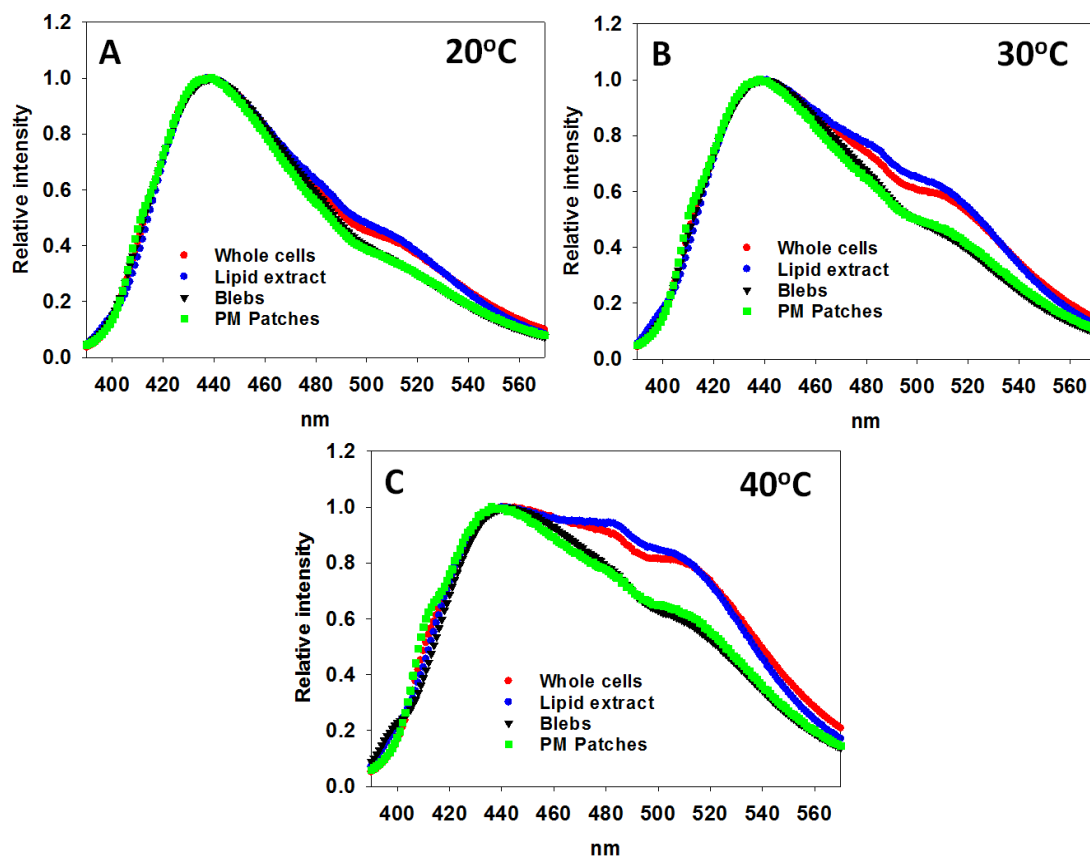

**Figure S1. Laurdan GP measurements.** Phase fluctuation in phospholipid membranes revealed by Laurdan fluorescence at (A) 20°C, (B) 30°C, and (C) 40°C. Red, whole CHO cells; blue, SUV formed from CHO cell lipid extract; black, blebs from CHO cells; green, PM patches from CHO cells.



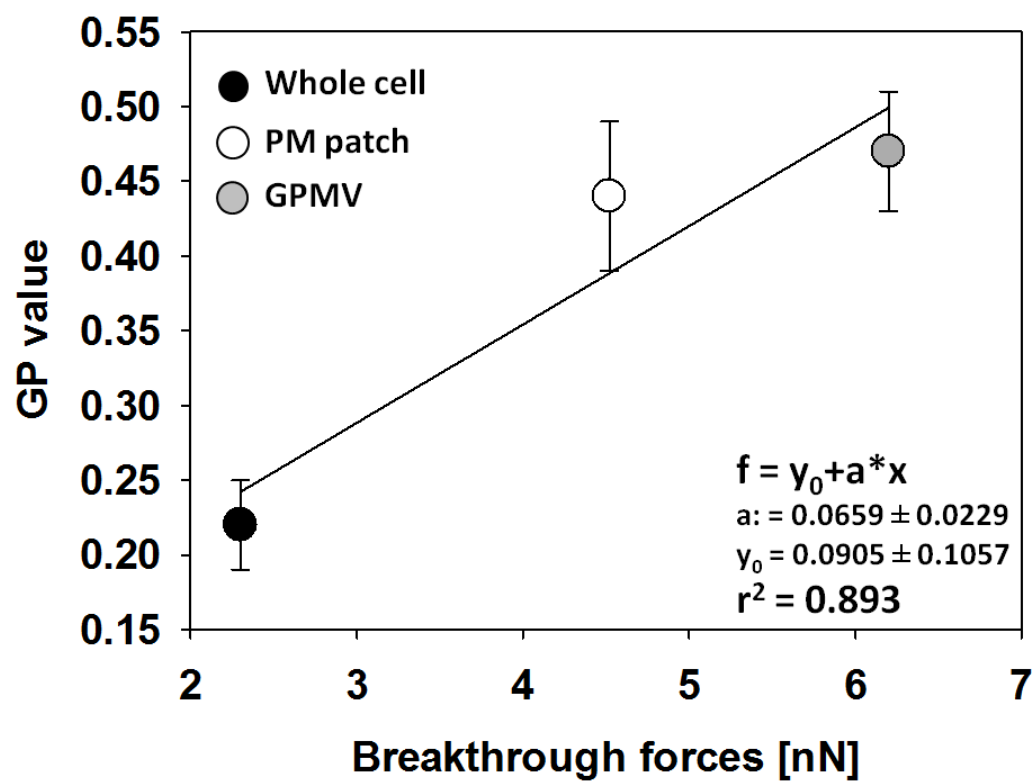

**Figure S2. AFM - Laurdan fluorescence correlation.** The correlation between Laurdan GP and bilayer breakthrough forces is shown as a regression line ( $r^2 = 0.893$ ). The experimental points correspond to whole cells (black), PM patches (white), and GPMV (gray circle). Average values  $\pm$  S.D.

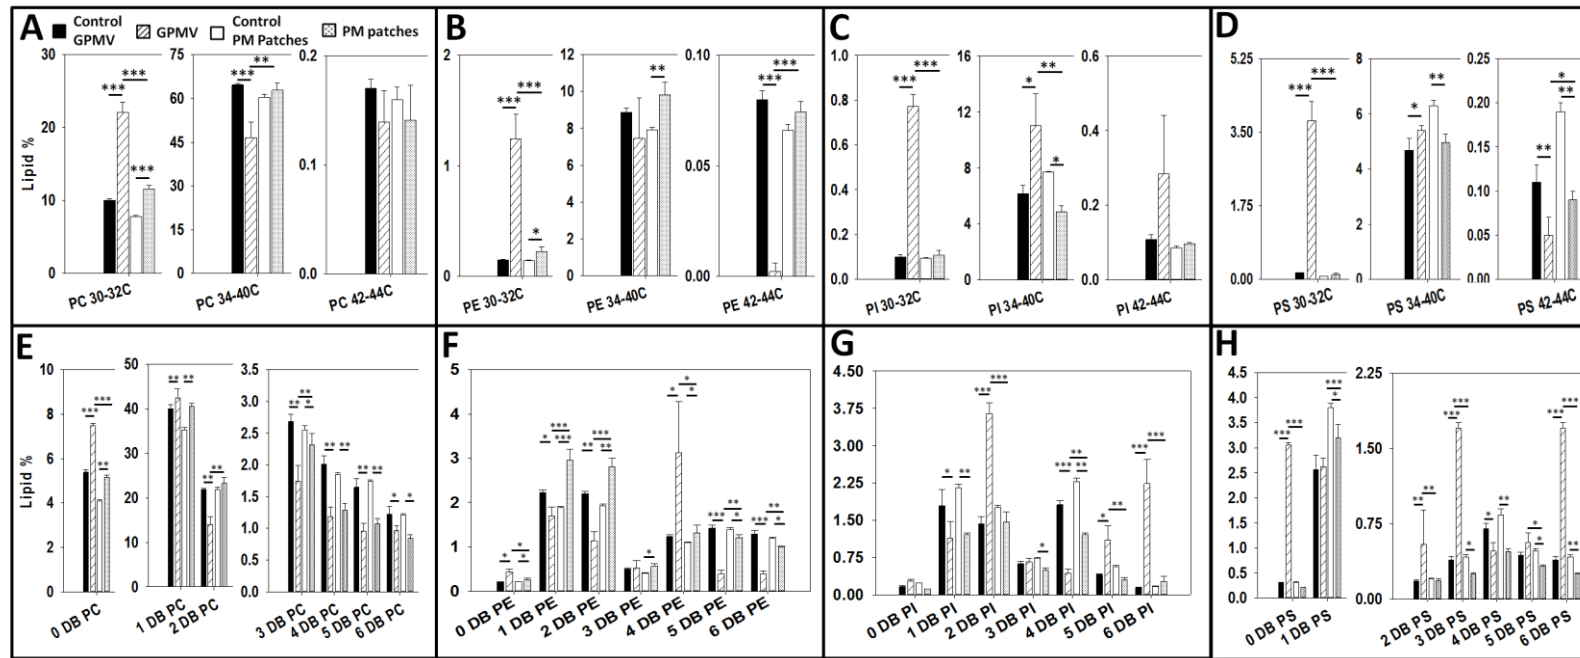

**Figure S3.** Lipid distribution according to chain length and saturation level (DB = double bond) of A and E, PC; B and F, PE; C and G, PI and D and H, PS. Bars: solid black, whole cells treated for GPMV preparation; striped, GPMV (blebs); empty, cells treated for PM patch preparation; dotted PM patches. Significance: (\*)  $p < 0.05$ ; (\*\*0  $p < 0.01$ ); (\*\*\*)  $p < 0.001$

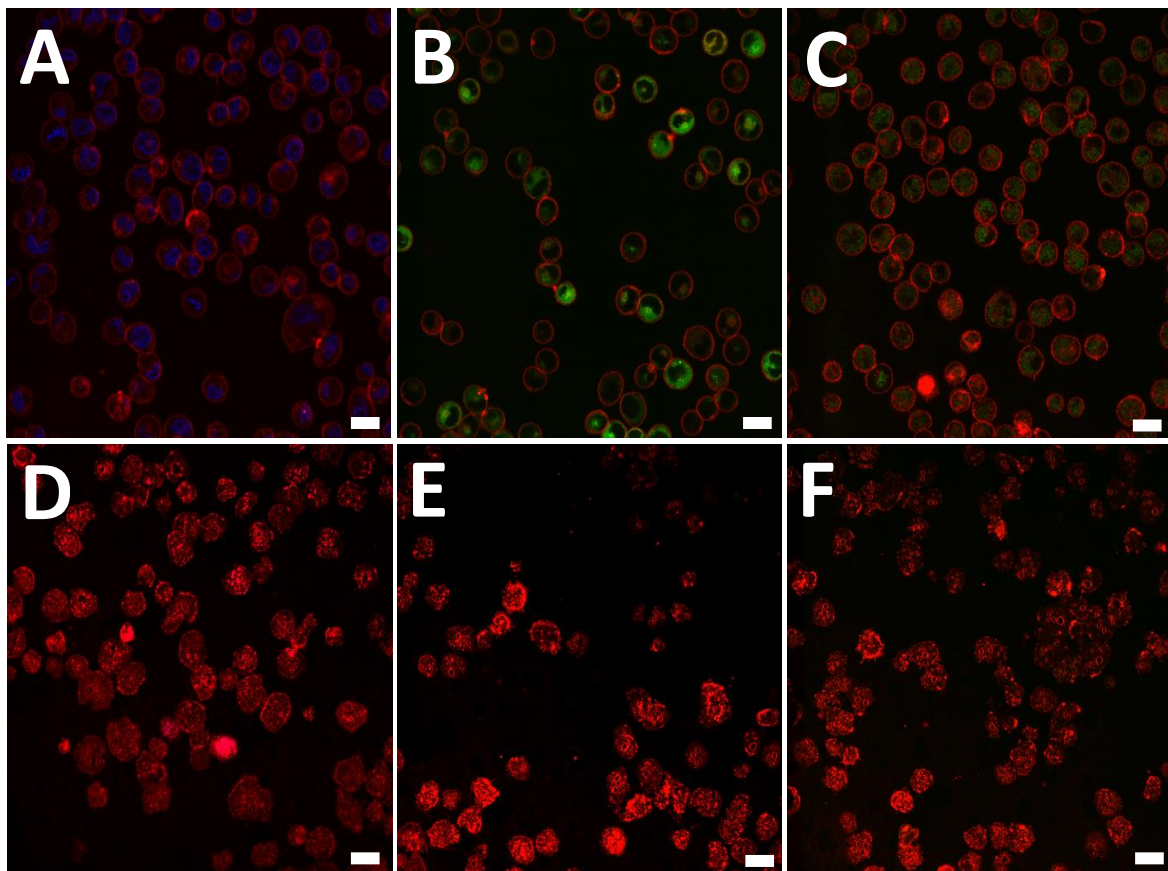

**Figure S4. PM patch purification.** (A-C), whole cells; (D-F), PM patches. All samples have been treated with Di-4 ANEPPDHQ as a general membrane fluorescent stain. In addition, the following organelle-specific dyes have been used: Hoechst 33342 for nuclei (A and D), Mitotracker Green for mitochondria (B and E), Bodipy-FL-C5-Cer for Golgi (C and F). Bar 20  $\mu\text{m}$
